# Supplementary material
Source: MDPI journal article supplement (https://www.mdpi.com/2073-4441/13/2/214)
Supplement: s1 [file s1]

# Impact of Suspended Solids and Organic Matter on Chlorine and UV Disinfection Efficiency of Greywater

Eran Friedler <sup>1</sup>, Diana F. Chavez <sup>2</sup>, Yuval Alfiya <sup>1</sup>, Yael Gilboa <sup>1</sup> and Amit Gross <sup>2,\*</sup>

## Supplementary Materials

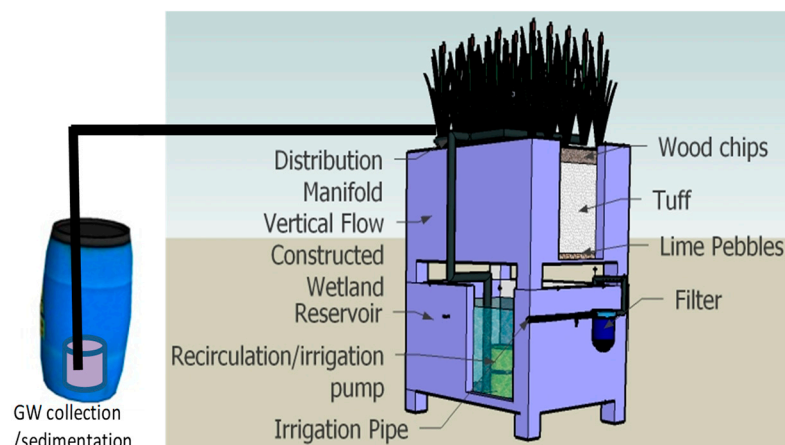

**Figure S1.** Schematic of the onsite recirculating vertical flow-constructed wetlands (RVFCW) GW treatment system (After Alfiya et al., 2013).

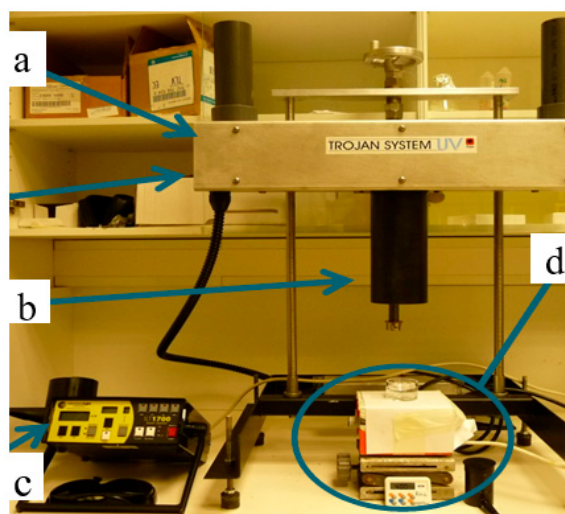

**Figure S2.** Trojan UV collimated beam system excluding the shutter. a) UV lamp, b) collimated beam, c) Radiometer, and d) water sample with magnetic bar on the stirrer.
